# Supplementary material
Source: Research Square preprint supplement (doi:10.21203/rs.3.rs-9092323/v1)

# Co-SPACES

## Co-Creation & Critique Workshop

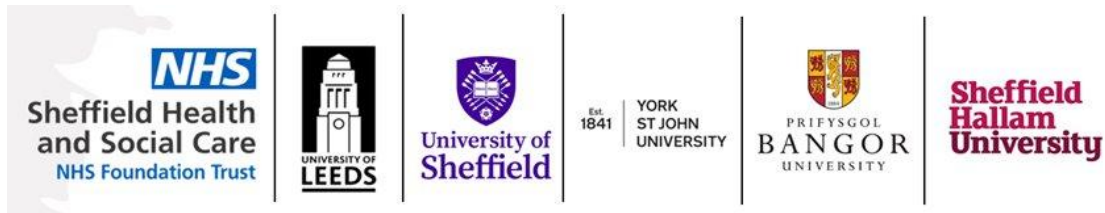

# Workshop 2 Agenda

|               |                                                                                   |
|---------------|-----------------------------------------------------------------------------------|
| 11:00 –11:15  | <b>Arrival and coffee</b>                                                         |
| 11:15 –11:30  | Recap of Co-SPACES aim and workflow                                               |
| 11:30 – 12:00 | Results from workshop 1<br>Example resources from other studies / grey literature |
| 12:00 – 12:30 | <b>Lunch</b>                                                                      |
| 12:30 – 13:45 | Task 1: Co-creation of resource content                                           |
| 13:45 – 14:00 | <b>Break</b>                                                                      |
| 14:00 – 15:00 | Task 2: Share, critique, and reflection session                                   |
| 15:00 – 15:30 | Summing up and close                                                              |

# SPACES

A physical activity intervention integrated into NHS care co-developed with and for people with severe mental illness

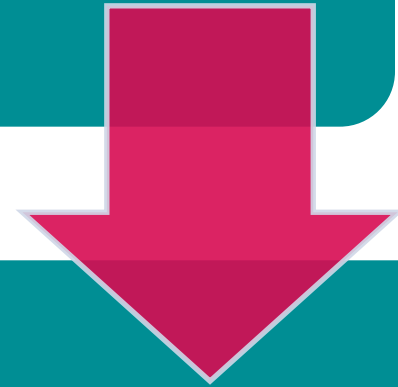

## Co-SPACES

Exploring the community aspect of supporting those with severe mental illness to be physically active in their community

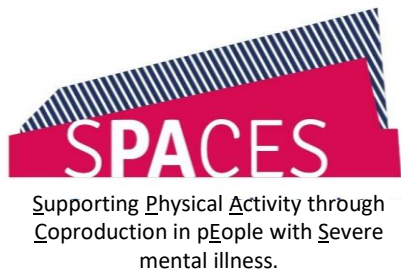

# Co-SPACES project flow diagram

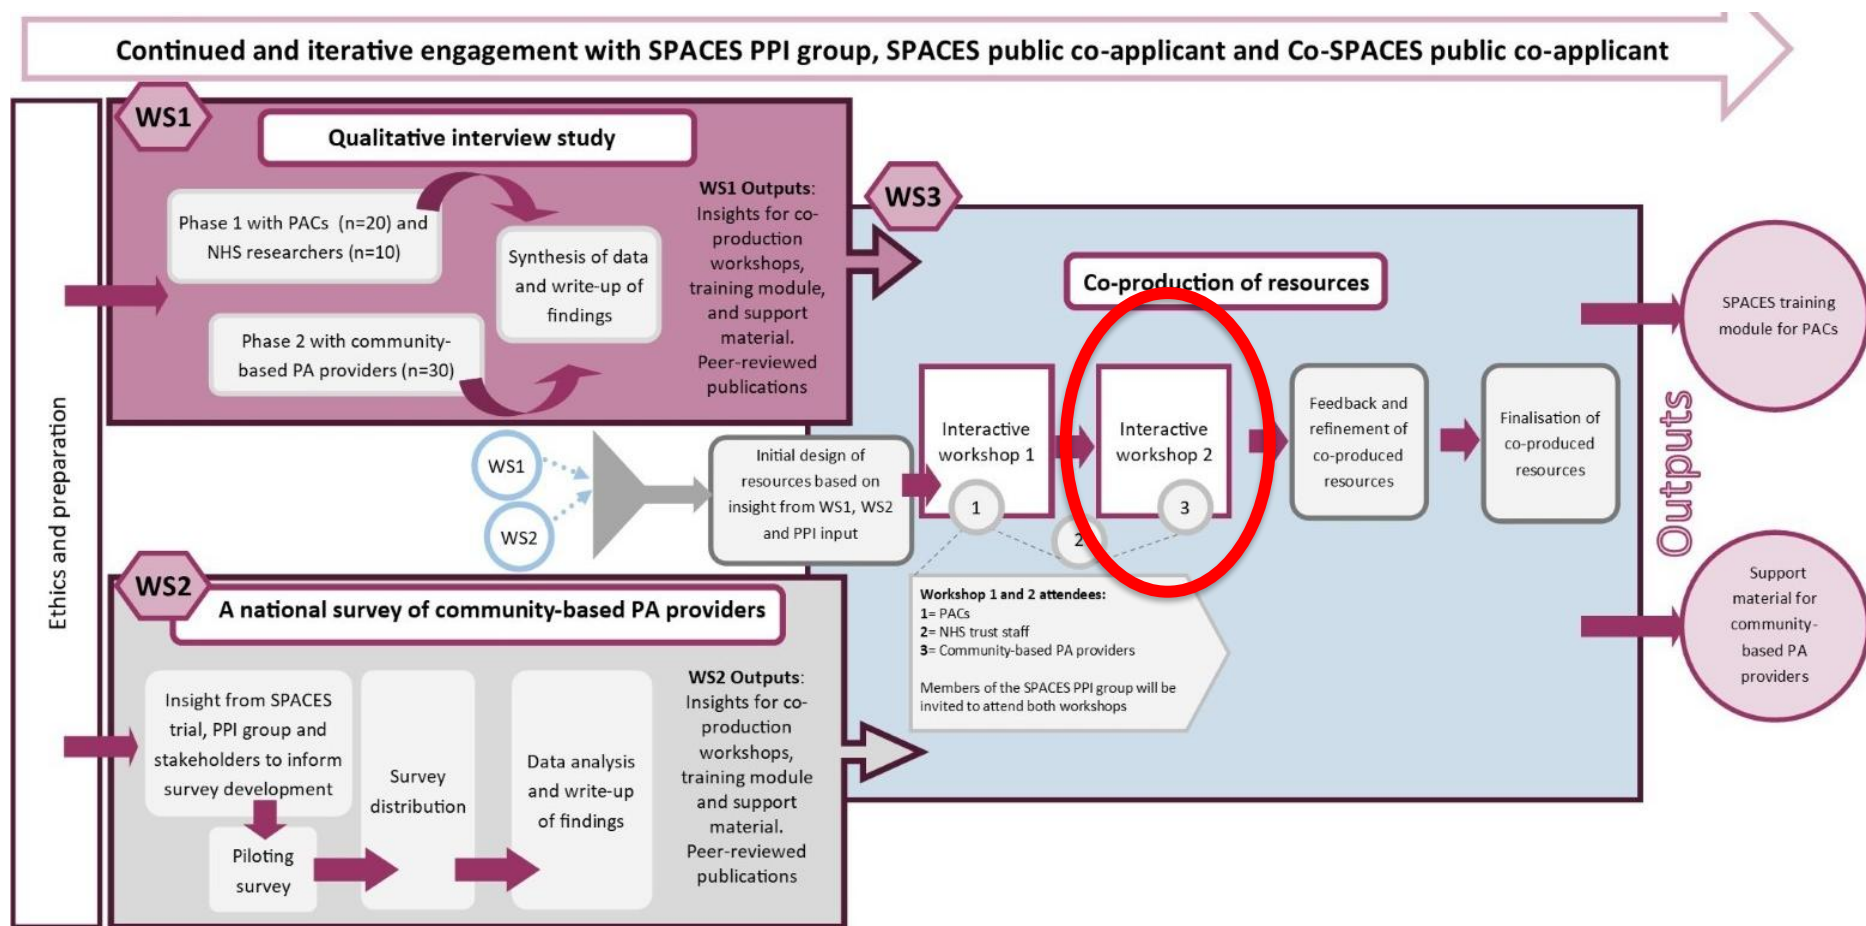

PA = physical activity; PACs= SPACES Physical Activity Coordinators; PMG= Co-SPACES Programme Management Group; PPI= patient and public involvement group; WS= workstream

# Workshop 1

## Question 1:

Why might a PAC struggle to identify and engage with community-based physical activity providers?

## Question 2:

What issues do physical activity providers in the community face, when trying to engage people with SMI into their physical activity provision?

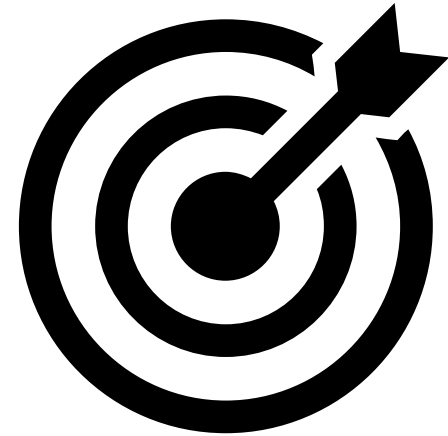

**Co-SPACES aim:**  
How can we help them?

# Results from workshop 1

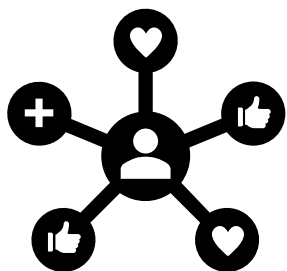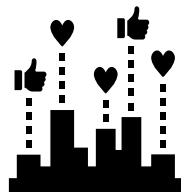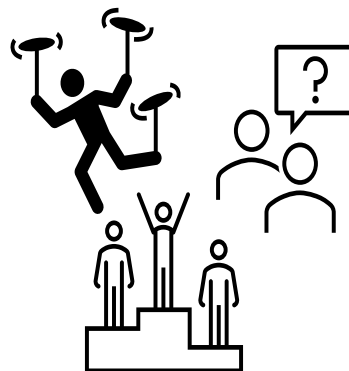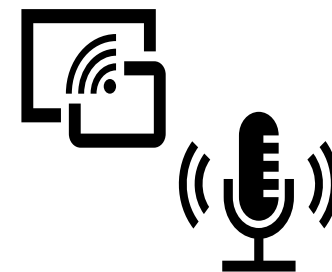

|                                                      |                                                          |                                                                 |                                                                                      |
|------------------------------------------------------|----------------------------------------------------------|-----------------------------------------------------------------|--------------------------------------------------------------------------------------|
| Update PAC training                                  | Infographic<br>Venue use and circumnavigating challenges | Infographic<br>What is SMI, adaptations to PA sessions for CAPs | Video case studies + infographic applied aspects of delivering intervention at venue |
| Aimed at PACs                                        | Aimed at PACs and CAPs                                   | Aimed at CAPs and those with lived experience                   | Aimed at PACs, CAPs and those with lived experience                                  |
| PACs updated 10th June and training slides updated ✓ | Group A                                                  | Group B                                                         | Requires more time                                                                   |

# Aim of Today's Workshop

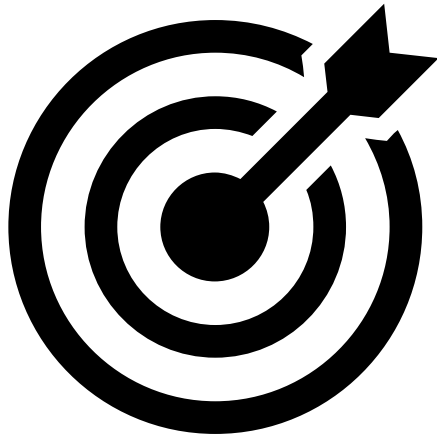

**Co-SPACES aim:**  
How can we help  
them?

## Group A: Creating SMI friendly venues

- Infographic
- Example venues and how different spaces have been used (e.g., green spaces).
- How to circumnavigate challenges,
- Case study of what's worked in the past

## Group B: What is SMI & adapting your physical activity session to be SMI friendly

- Infographic for providers of what SMI is and how to adapt sessions etc.,
- Sign-post to existing training, list of MH training courses (e.g., Mind)

# Example resources

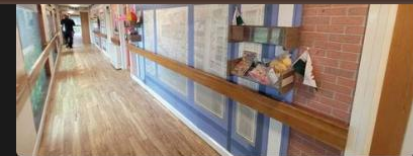

Mural's create a dementia friendly env...  
findmemorycare.co.uk

Local Dementia Friendly Cafe...  
www.shwp.org.uk

Dementia Friend...  
safecarehomesupp...

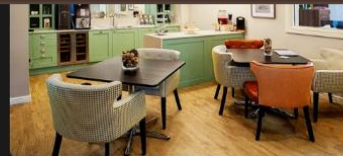

Meallmore plans to raise demen...  
www.laingbuissonnews.com

Dementia Caf...  
www.thefoxand...

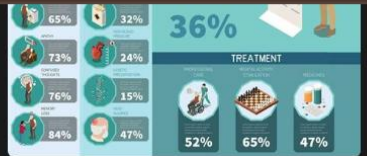

Dementia and Alzheimer Infograp...  
www.vecteezy.com

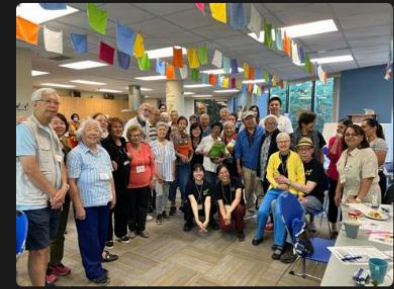

Dementia Friendly Cafe - UBC IDEA...  
idea.nursing.ubc.ca

Stages o...  
dementiae...

Dementia Friendly P...  
www.dementiafriendly...

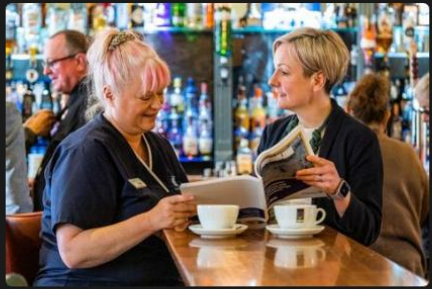

UK Gov supports plan to create Dementi...  
www.miragenews.com

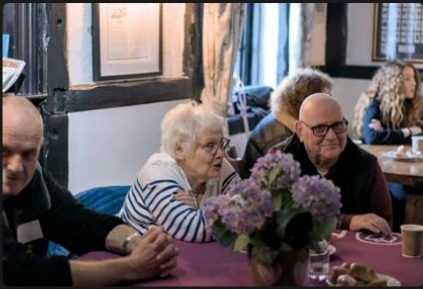

Dementia Cafe - The Fox and Castle Pu...  
www.thefoxandcastleoldwindsor.com

Dementia Friendl...  
somesetcarers.org

Infographic: Do's and Don'ts: Commun...  
www.nia.nih.gov

Making Kidsg...  
www.goodnews...

Dementia Frie...  
www.gerascentre...

Psychiatry.org - What Is Mild Cognitiv...  
www.psychiatry.org

Dementia Friendly - Retail - YouTube  
www.youtube.com

RES Home Care | Gu...  
www.reshomecarell.com

[Explore the web for inspiration](#)

# Pre-task work: Design ideas – what do you like?

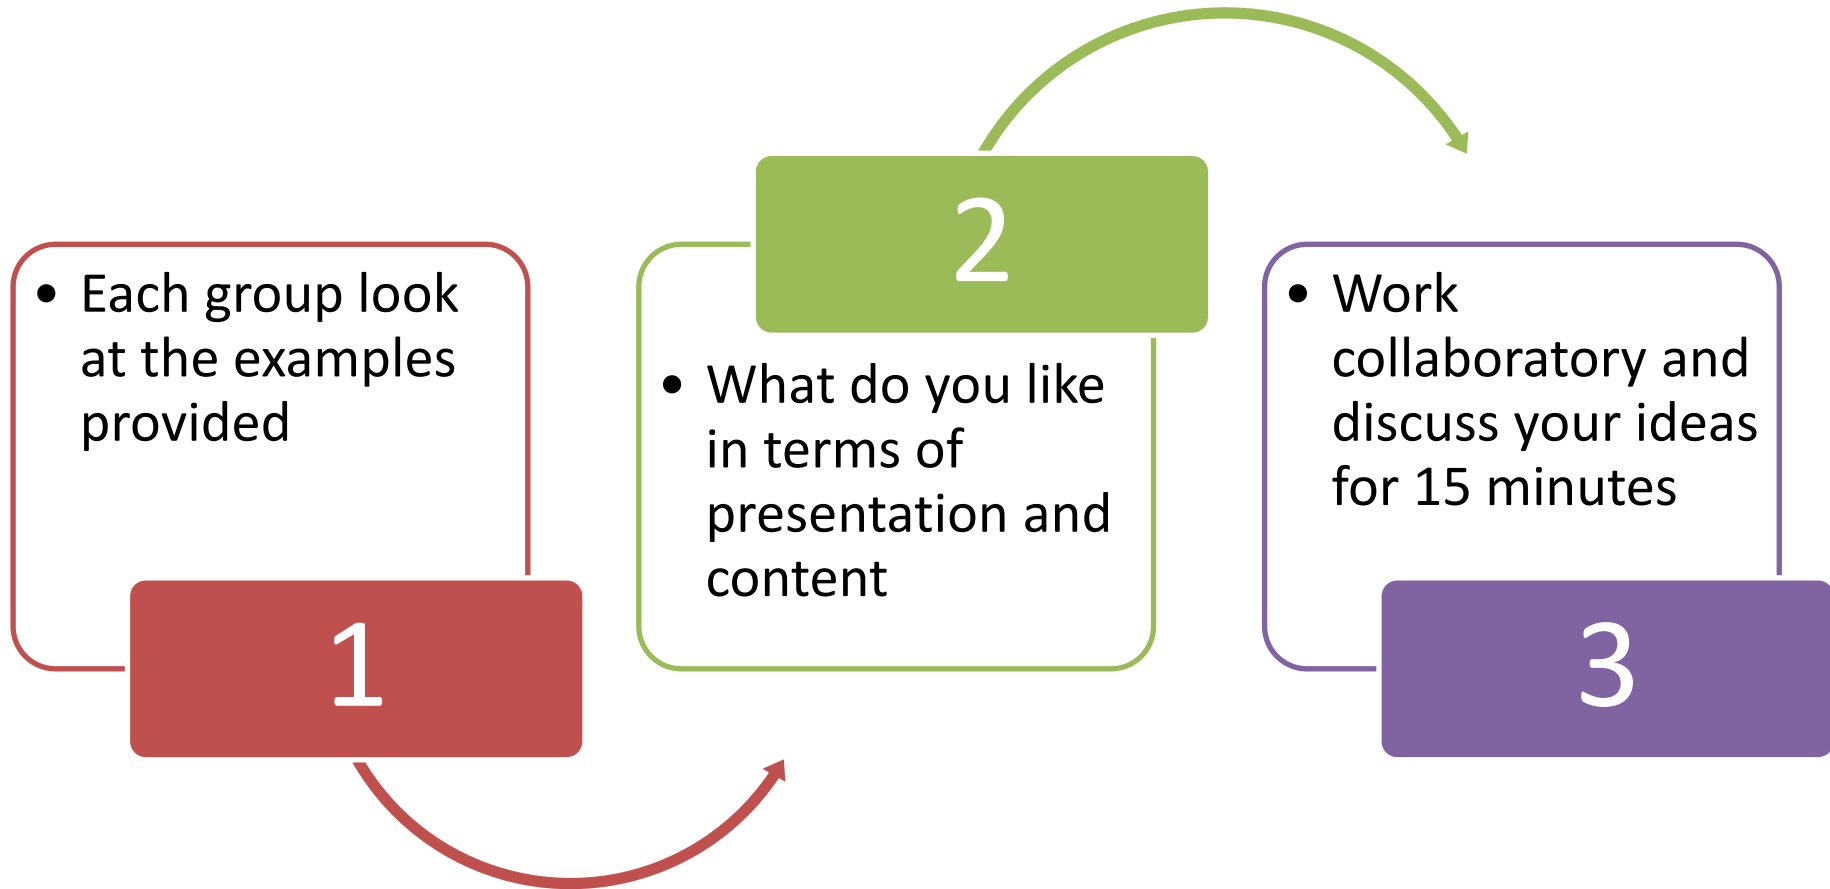

# Prompts to get going

- Take 10–15 minutes to explore the resources.
- Use the handout or sticky notes to jot down feedback.
- Prompt suggestions:
  - 'I like...'
  - 'I wish...'
  - 'What if...'

# LUNCH

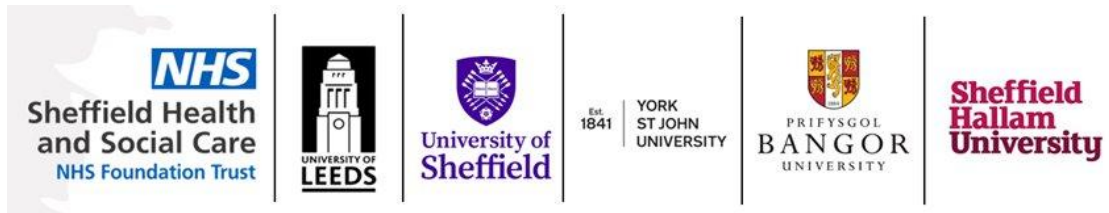

# Task 1: Co-creation of resource content

In your groups...

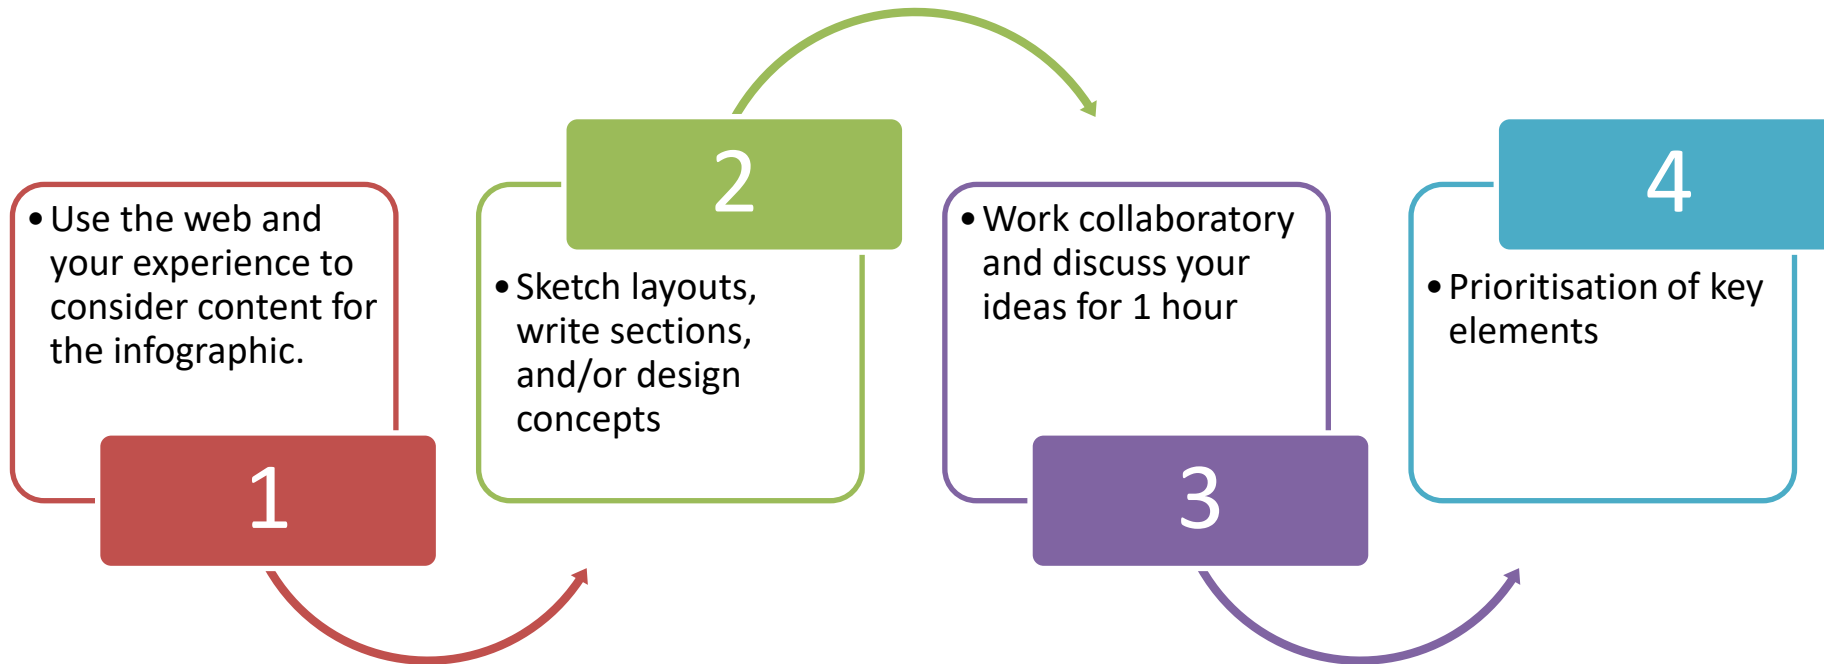

# Task 2: Share, critique, and revise

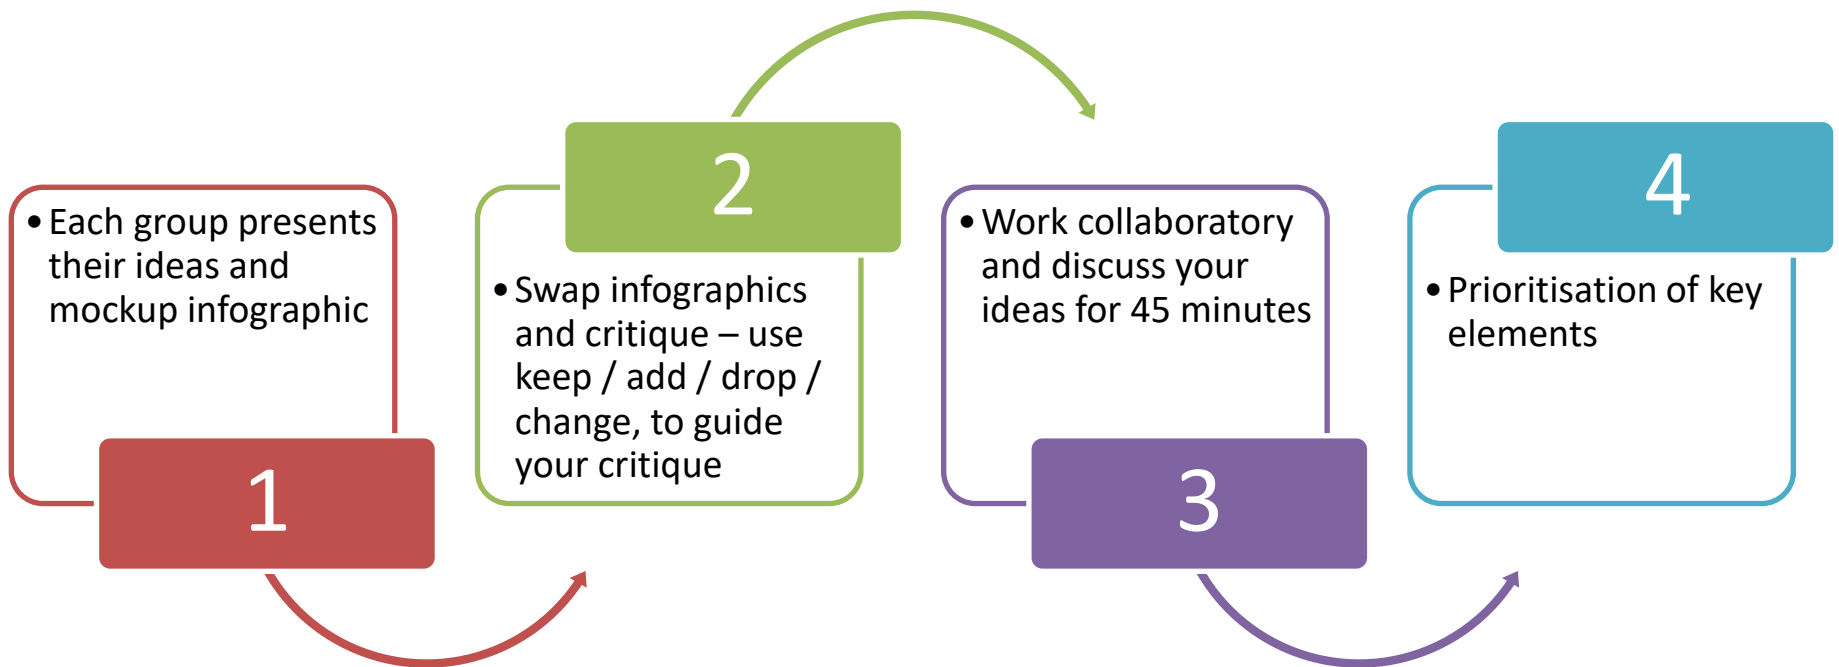

## Task 2: Reshare and reflect

- Each group presents revised versions or improvement ideas.
- Share for 5-10 minutes per group.
- Use your dots to prioritise key elements

# Summing up

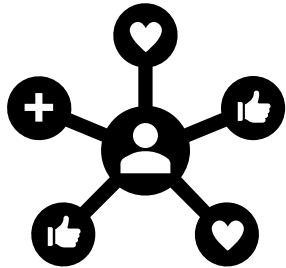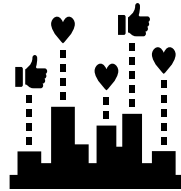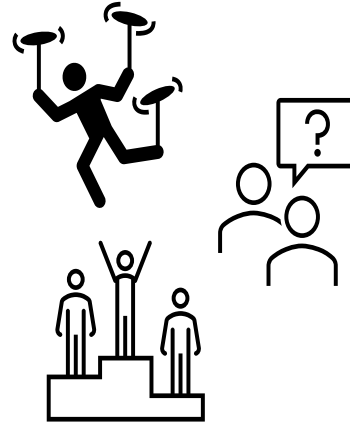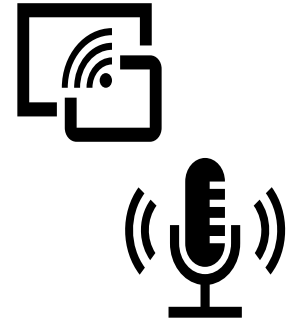

|                                                                              |                                                                  |                                                                         |                                                                                                          |
|------------------------------------------------------------------------------|------------------------------------------------------------------|-------------------------------------------------------------------------|----------------------------------------------------------------------------------------------------------|
| <p>Recommendation<br/>Find networks not just CAPs</p>                        | <p>Infographic<br/>Venue use and circumnavigating challenges</p> | <p>Infographic<br/>What is SMI, adaptations to PA sessions for CAPs</p> | <p>Awareness video of case studies + infographic applied aspects of delivering intervention at venue</p> |
| <p>PAC training update delivered 10th June and training slides updated ✓</p> | <p>Group A ✓</p>                                                 | <p>Group B ✓</p>                                                        | <p>Requires more time</p>                                                                                |

# What happens next?

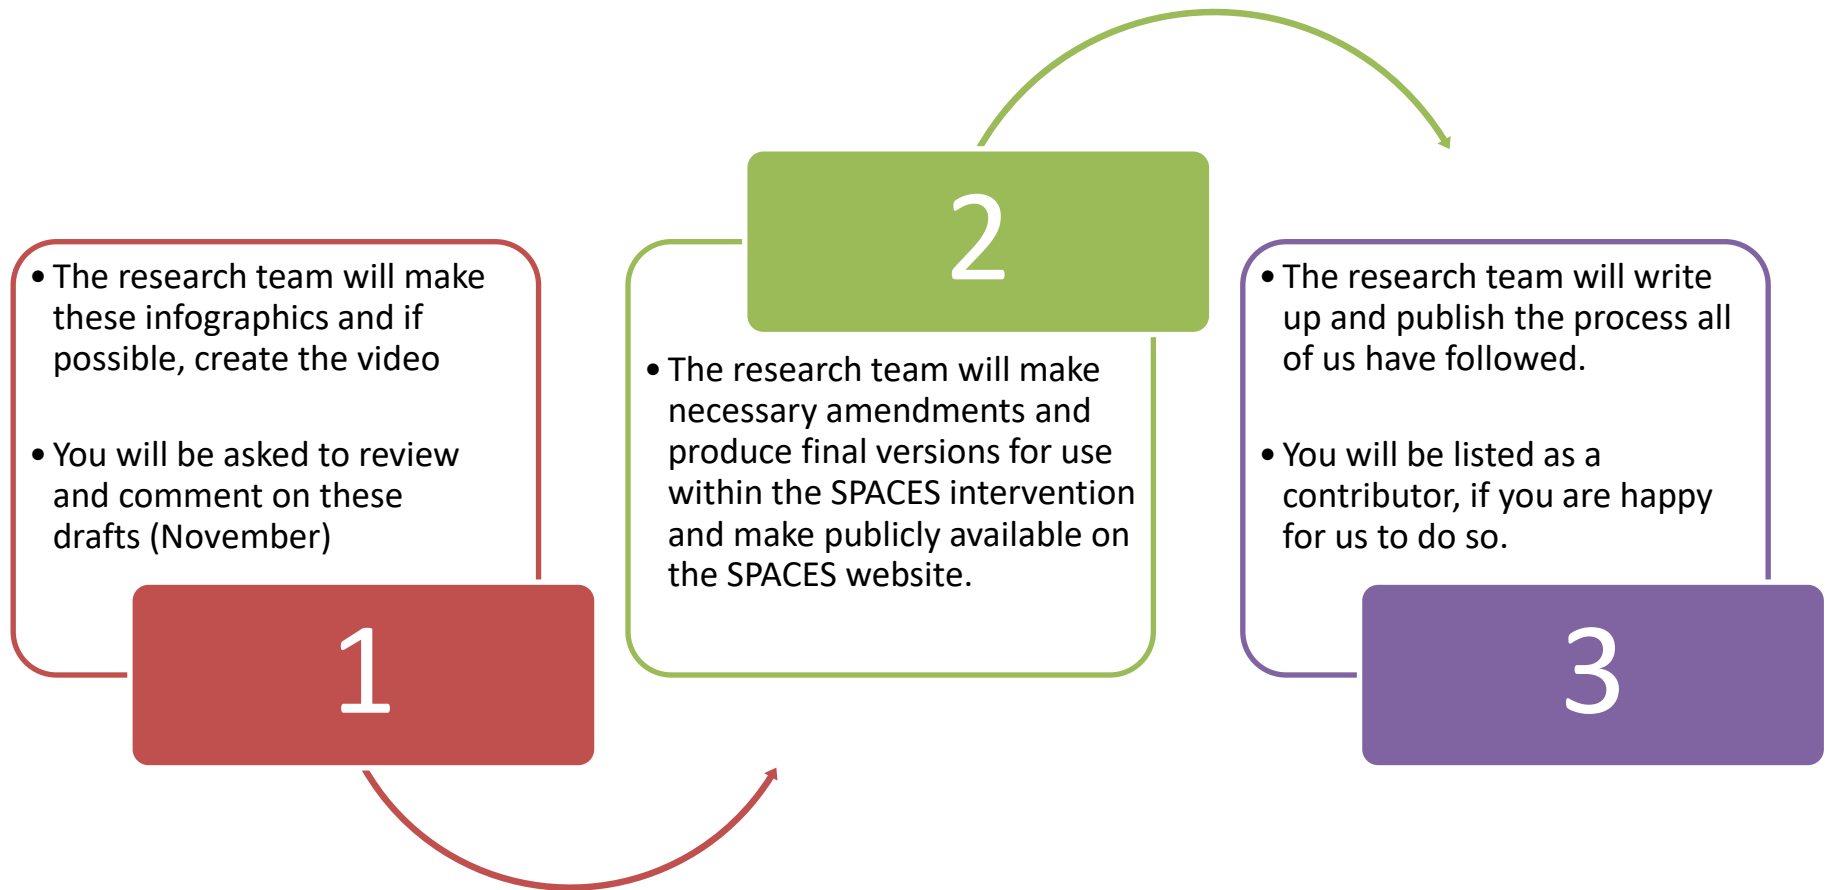

## Co-SPACES

Thank you for all your time, effort,  
and invaluable input.



Supplement: Supplementary file 7 [file efb123a8afe6a1e17bfde346.pdf]
